# Supplementary material for: COVIEdb: A Database for Potential Immune Epitopes of Coronaviruses
Source: Front Pharmacol. 2020 Sep 2;11:572249. doi: 10.3389/fphar.2020.572249 (PMC7898897; doi:10.3389/fphar.2020.572249)
Supplement: Supplementary file 2 [file Table_2.xlsx]

## Sheet: Table S2
Supplemental Table 2a. The threshold of different tools for B cell epitopes prediction
Tool	Threshold
Bepipred	>0.35
Bepipred2	>0.5
Chou & Fasman	>average
Emini	>1
Karplus & Schulz	>average
Kolaskar & Tongaonkar	>average
Parker	>average
Supplemental Table 2b. The threshold of different tools for T cell epitopes prediction
Tool	Threshold
DeepHLApan binding score	>0.5
DeepHLApan immunogenic score	>0.5
NetMHCpan affinity	<500nM
NetMHCpan Rank	<2%
MHCflurry Rank	<2%
NetMHCIIpan Rank	<10%
Mixmhc2pred	<2%
